# Supplementary material for: Hyaluronic acid-coated poly(β-amino) ester nanoparticles as carrier of doxorubicin for overcoming drug resistance in breast cancer cells
Source: Royal Society of Chemistry journal article supplement (doi:10.1039/c6ra03997a), 2016-01-01
Supplement: c6ra03997a1.pdf [file c6ra03997a1.pdf]

## Supporting information for

### Hyaluronic acid-coated poly( $\beta$ -amino) ester nanoparticles as carrier of doxorubicin for overcoming drug resistance in breast cancer cells

Tong An,<sup>a,†</sup> Cong Zhang,<sup>a,†</sup> Xue Han,<sup>a</sup> Guoyun Wan,<sup>a</sup> Dan Wang,<sup>a</sup> Zhe Yang,<sup>a</sup> Yue Wang,<sup>b</sup>  
Lianyun Zhang,<sup>b</sup> Yinsong Wang<sup>a,\*</sup>

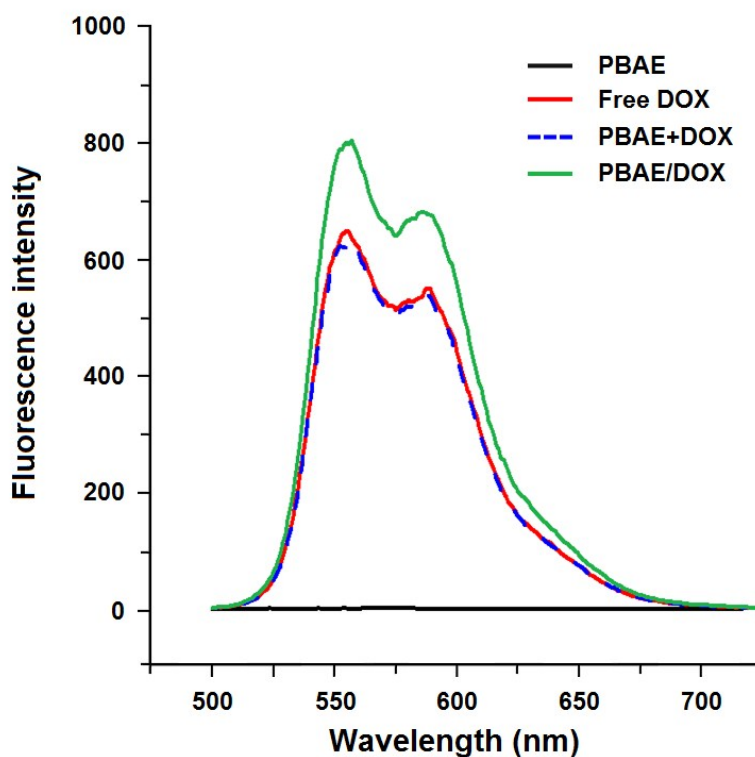

Fig. S1. Fluorescence emission spectra of blank PBAE nanoparticles, free DOX, the physical mixture of DOX and blank PBAE nanoparticles, and PBAE/DOX nanoparticles. The DOX concentrations were 5  $\mu\text{g/mL}$ .
